# Supplementary material
Source: Springer Nature journal article supplement (https://www.springermedizin.de/resource/supplementary/12936_2011_2001_MOESM7_ESM.pdf/9543102)

# Number of Heterozygous Calls by Clinical Group

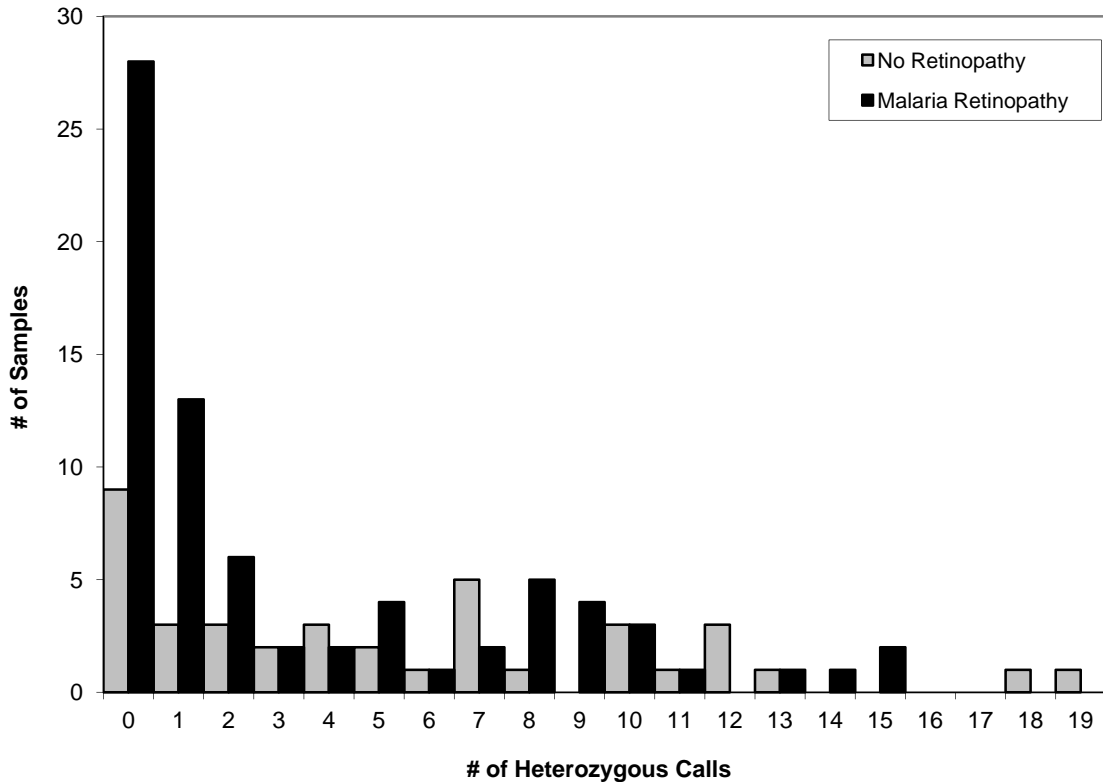

Supplement: MOESM7 [file 9543102]
